# Supplementary material for: Impact evaluation of a community-based intervention to reduce risky sexual behaviour among female sex workers in Shanghai, China
Source: PubMed Central journal article supplement (PMC4377073; doi:10.1186/s12889-015-1439-5), 2015-02-14
Supplement: 12889_2015_1439_MOESM1_ESM.pdf [file 12889_2015_1439_MOESM1_ESM.pdf]

## Additional File 1

**Table S1 Baseline demographic and behavioural characteristics among 499 FSWs with follow-up and those lost to follow-up, Shanghai, 2009**

|                                   |                            | Intervention               |                               | Control                    |                        |
|-----------------------------------|----------------------------|----------------------------|-------------------------------|----------------------------|------------------------|
|                                   |                            | Followed, n (%)<br>(n=221) | Lost, n (%)<br>(n=154)        | Followed, n (%)<br>(n=278) | Lost, n (%)<br>(n=97)  |
| Age (years)                       | Mean (IQR)                 | 27.8 (22-33)               | 26.4 (22-31)                  | 27.7 (21-33)               | 26.3 (22-30)           |
|                                   | 16-19                      | 19 (8.6)                   | 19 (12.3)                     | 25 (9.0)                   | 13 (13.4)              |
|                                   | 20-24                      | 59 (26.7)                  | 53 (34.4)                     | 98 (35.3)                  | 35 (36.1)              |
|                                   | 25-29                      | 64 (29.0)                  | 38 (24.7)                     | 43 (15.5)                  | 24 (24.7)              |
|                                   | 30-34                      | 40 (18.1)                  | 22 (14.3)                     | 59 (21.2)                  | 12 (12.4)              |
|                                   | 35-39                      | 23 (10.4)                  | 18 (11.7)                     | 33 (11.9)                  | 8 (8.2)                |
|                                   | 40+                        | 16 (7.2)                   | 4 (2.6)                       | 20 (7.2)                   | 5 (5.2)                |
| Ethnicity (%)                     | Han                        | 209 (94.6)                 | 147 (96.1)                    | 266 (96.7)                 | 91 (93.8)              |
|                                   | Other                      | 12 (5.4)                   | 6 (3.9%)                      | 9 (3.3)                    | 6 (6.2)                |
| Education (years)                 | Mean (IQR)                 | 7.9 (6-9)                  | 8.2 (7.5-9)                   | 8.2 (6-9)                  | 8.3 (7.5-9)            |
|                                   | None                       | 5 (2.3)                    | 1 (0.7)                       | 6 (2.2)                    | 4 (4.1)                |
|                                   | Elementary                 | 54 (24.4)                  | 33 (21.6)                     | 71 (25.5)                  | 19 (19.6)              |
|                                   | Junior high                | 120 (55.4)                 | 89 (58.2)                     | 145 (52.2)                 | 53 (54.6)              |
|                                   | High school                | 40 (18.1)                  | 26 (17.0)                     | 51 (18.3)                  | 13 (13.4)              |
|                                   | College or above           | 2 (0.9)                    | 4 (2.6)                       | 5 (1.8)                    | 8 (8.2)                |
| Marital status (%)                | Single, never married      | 58 (26.4)                  | 40 (26.3)                     | 80 (28.8)                  | 37 (38.1)              |
|                                   | Cohabiting                 | 29 (13.2)                  | 29 (19.1)                     | 45 (16.2)                  | 22 (22.7)              |
|                                   | Married/remarried          | 110 (50.0)                 | 72 (47.4)                     | 123 (44.2)                 | 31 (32.0)              |
|                                   | Separated/divorced/widowed | 23 (10.5)                  | 11 (7.2)                      | 30 (10.8)                  | 7 (7.2)                |
| Annual income (USD <sup>a</sup> ) | Mean (IQR)                 | 6740 (4800-8640)           | 9560 (4800-7500) <sup>b</sup> | 7600 (4800-8640)           | 8640 (4800-7500)       |
|                                   | \$0 - \$3839               | 54 (24.8)                  | 28 (18.5)                     | 62 (22.9)                  | 16 (16.5)              |
|                                   | \$3840 - \$5759            | 64 (29.4)                  | 30 (19.9)                     | 88 (32.5)                  | 35 (36.1)              |
|                                   | \$5760 - \$7679            | 38 (17.4)                  | 26 (17.2)                     | 41 (15.1)                  | 12 (12.4)              |
|                                   | \$7680 - \$9599            | 29 (13.3)                  | 10 (6.6)                      | 17 (6.3)                   | 6 (6.2)                |
|                                   | \$9600 - \$19199           | 24 (11.0)                  | 38 (25.2)                     | 41 (15.1)                  | 16 (16.5)              |
|                                   | \$19200 or more            | 9 (4.1)                    | 19 (12.6)                     | 22 (8.1)                   | 12 (12.4)              |
| Length in Shanghai (months)       | Mean (IQR)                 | 36.3 (7-60)                | 30.5 (4-47)                   | 38.0 (10-55)               | 31.1 (4-48)            |
| Duration of sex work (months)     | Mean (IQR)                 | 21.6 (6-24)                | 17.0 (3-24) <sup>b</sup>      | 16.6 (6-24)                | 15.1 (5-18)            |
| Number of clients per week        | Mean (IQR)                 | 9.0 (3-14)                 | 9.7 (3-15)                    | 7.3 (3-9)                  | 6.9 (2-8)              |
| Venue type                        | KTV/night club/spa         | 68 (30.8)                  | 48 (31.2) <sup>b</sup>        | 59 (21.2)                  | 41 (42.3) <sup>b</sup> |
|                                   | Barbershop                 | 91 (41.2)                  | 75 (48.7)                     | 102 (36.7)                 | 21 (21.6)              |
|                                   | Foot massage               | 49 (22.2)                  | 31 (20.1)                     | 101 (36.3)                 | 34 (35.1)              |
|                                   | Other <sup>c</sup>         | 13 (5.9)                   | 0 (0.0)                       | 16 (5.8)                   | 1 (1.0)                |

<sup>a</sup> 1 USD = ~6.25 Chinese yuan

<sup>b</sup> p < 0.05 comparison within groups

<sup>c</sup> Includes beauty salon, bath house, and other small venues

**Table S2 Condom use among 499 FSWs<sup>a</sup> at baseline and six months after intervention, Shanghai, 2009-10**

|                                                                               | Intervention (n=221) |                     |         | Control (n=278)    |                     |         | Intervention vs. Control<br>p-value |           | AOR (95% CI) <sup>b</sup> | p-value |
|-------------------------------------------------------------------------------|----------------------|---------------------|---------|--------------------|---------------------|---------|-------------------------------------|-----------|---------------------------|---------|
|                                                                               | Baseline,<br>% (n)   | Follow-up,<br>% (n) | p-value | Baseline,<br>% (n) | Follow-up,<br>% (n) | p-value | Baseline                            | Follow-up |                           |         |
| Condom use in the most recent sex act with a client                           | 79.2 (207)           | 91.2 (216)          | 0.0008  | 81.4 (263)         | 86.3 (270)          | 0.1531  | 0.6427                              | 0.1234    | 1.85 (0.91-3.75)          | 0.0898  |
| Consistent condom use in the three most recent sex acts with clients          | 69.5 (203)           | 87.1 (217)          | <0.0001 | 72.9 (255)         | 84.3 (267)          | 0.0023  | 0.4744                              | 0.4536    | 1.10 (0.61-1.96)          | 0.7567  |
| Condom use in the most recent sex act with a primary partner                  | 52.6 (175)           | 73.4 (158)          | 0.0001  | 52.8 (214)         | 62.4 (218)          | 0.0552  | 1.000                               | 0.0328    | 1.75 (1.07-2.86)          | 0.0249  |
| Consistent condom use in the three most recent sex acts with primary partners | 45.5 (167)           | 58.8 (160)          | 0.0223  | 39.7 (209)         | 47.2 (218)          | 0.1409  | 0.3052                              | 0.0351    | 1.59 (1.00-2.51)          | 0.0482  |
| Used a condom every time having sex in the past month                         | 46.0 (215)           | 71.9 (217)          | <0.0001 | 42.6 (263)         | 47.4 (270)          | 0.3023  | 0.557                               | <0.0001   | 2.82 (1.89-4.23)          | <0.0001 |

<sup>a</sup> Includes participants who had follow-up visit: 221 participants were in the intervention group and 278 in the control group.

<sup>b</sup> Adjusted odd ratio, intervention group vs. control group at follow-up after adjusting for baseline level and venue type

**Table S3 Mean scores of HIV/STI, condom knowledge, self-efficacy, stigma among 499 FSWs<sup>a</sup> at baseline and 6 months after intervention, Shanghai, 2009-10**

|                                         | Intervention (n=221)     |                           |         | Control (n=278)          |                           |         | Intervention vs. Control<br>p-value |           | Adjusted mean score (95%CI)<br>at follow-up <sup>b</sup> |                  |         |
|-----------------------------------------|--------------------------|---------------------------|---------|--------------------------|---------------------------|---------|-------------------------------------|-----------|----------------------------------------------------------|------------------|---------|
|                                         | Baseline, mean score (n) | Follow-up, mean score (n) | p-value | Baseline, mean score (n) | Follow-up, mean score (n) | p-value | Baseline                            | Follow-up | Intervention                                             | Control          | p-value |
| HIV transmission (max=10)               | 6.91 (220)               | 9.14 (221)                | <0.0001 | 7.44 (276)               | 8.23 (276)                | <0.0001 | 0.0046                              | <0.0001   | 9.20 (8.94-9.45)                                         | 8.20 (7.96-8.44) | <0.0001 |
| Other HIV knowledge (max=6)             | 3.48 (220)               | 4.85 (221)                | <0.0001 | 3.22 (276)               | 3.80 (277)                | <0.0001 | 0.062                               | <0.0001   | 4.69 (4.47-4.92)                                         | 3.81 (3.61-4.02) | <0.0001 |
| STI knowledge (max=4)                   | 3.03 (221)               | 3.71 (221)                | <0.0001 | 3.10 (276)               | 3.42 (277)                | <0.0001 | 0.4415                              | <0.0001   | 3.68 (3.57-3.80)                                         | 3.39 (3.29-3.50) | <0.0001 |
| Condom use skill (max=4)                | 2.44 (221)               | 3.11 (221)                | <0.0001 | 2.44 (276)               | 2.80 (278)                | <0.0001 | 0.9811                              | 0.0011    | 2.97 (2.84-3.11)                                         | 2.69 (2.56-2.81) | 0.0005  |
| Other condom knowledge (max=3)          | 2.26 (221)               | 2.70 (221)                | <0.0001 | 2.23 (275)               | 2.36 (278)                | 0.0086  | 0.587                               | <0.0001   | 2.67 (2.57-2.76)                                         | 2.37 (2.28-2.46) | <0.0001 |
| Condom self-efficacy (max=15)           | 11.7 (211)               | 13.5 (217)                | <0.0001 | 11.9 (267)               | 12.5 (278)                | 0.0004  | 0.0415                              | 0.3304    | 13.7 (13.3-14.1)                                         | 12.7 (12.4-13.1) | 0.0003  |
| Stigma toward persons with AIDS (max=7) | 3.00 (221)               | 2.36 (221)                | <0.0001 | 3.35 (276)               | 3.03 (278)                | 0.0018  | 0.0253                              | <0.0001   | 2.43 (2.20-2.66)                                         | 2.91 (2.70-3.12) | 0.0007  |

<sup>a</sup> Includes participants who had follow-up visit: 221 participants were in the intervention group and 278 in the control group.

<sup>b</sup> Mean score after adjusting for baseline measure of the outcome and venue type

**Table S4 Stigma toward persons with HIV among 499 FSWs<sup>a</sup> at baseline and at six months after intervention, Shanghai, 2009-10**

|                                                                                            | Intervention (n=221) |                     |         | Control (n=278)    |                     |         | Intervention vs. Control<br>p-value |           | AOR (95% CI) <sup>b</sup> | p-value |
|--------------------------------------------------------------------------------------------|----------------------|---------------------|---------|--------------------|---------------------|---------|-------------------------------------|-----------|---------------------------|---------|
|                                                                                            | Baseline,<br>% (n)   | Follow-up,<br>% (n) | p-value | Baseline,<br>% (n) | Follow-up,<br>% (n) | p-value | Baseline                            | Follow-up |                           |         |
| Would keep it secret if a family member was infected with HIV                              | 46.6 (221)           | 66.5 (22)           | <0.0001 | 55.1 (276)         | 65.1 (278)          | 0.020   | 0.0741                              | 0.8148    | 1.23 (0.82-1.83)          | 0.3118  |
| Would not be willing to care for a family member who became sick with HIV in her household | 4.5 (220)            | 2.3 (221)           | 0.2892  | 6.9 (274)          | 4.7 (277)           | 0.346   | 0.3524                              | 0.2293    | 0.53 (0.17-1.61)          | 0.2633  |
| Would not allow their child to be in same classroom with another child infected with HIV   | 53.4 (221)           | 39.4 (221)          | 0.0042  | 59.6 (275)         | 57.8 (277)          | 0.7182  | 0.1922                              | <0.0001   | 0.49 (0.34-0.72)          | 0.0003  |
| Would not eat in a restaurant where cook infected with HIV                                 | 78.3 (221)           | 52.5 (221)          | <0.0001 | 75.0 (276)         | 69.8 (278)          | 0.2013  | 0.4531                              | 0.0001    | 0.44 (0.30-0.65)          | <0.0001 |
| Would not be willing to work next to or near a person who is infected with HIV             | 62.9 (221)           | 40.7 (221)          | <0.0001 | 69.7 (277)         | 61.2 (278)          | 0.0432  | 0.1339                              | <0.0001   | 0.47 (0.32-0.68)          | <0.0001 |
| Would not tell a close family member if she learned she was infected with HIV              | 29.4 (221)           | 16.7 (221)          | 0.0023  | 32.0 (275)         | 28.4 (278)          | 0.4094  | 0.6013                              | 0.0031    | 0.55 (0.34-0.88)          | 0.012   |
| Didn't think people diagnosed with HIV should tell their sexual partners                   | 8.1 (221)            | 10.0 (221)          | 0.6189  | 17.0 (276)         | 6.8 (278)           | 0.0004  | 0.0053                              | 0.2728    | 1.91 (0.96-3.81)          | 0.0644  |

<sup>a</sup> Includes participants who had follow-up visit: 221 participants were in the intervention group and 278 in the control group.

<sup>b</sup> Adjusted odd ratio, intervention group vs. control group at follow-up after adjusting for baseline level and venue type

**Table S5 STI prevalence and 95% CI<sup>a</sup> among 499 FSWs<sup>b</sup> at baseline and six months after intervention, Shanghai, 2009-10**

|           | Intervention        |                      |         | Control             |                      |         | Intervention vs. Control |           | AOR (95% CI) <sup>c</sup> | p-value |
|-----------|---------------------|----------------------|---------|---------------------|----------------------|---------|--------------------------|-----------|---------------------------|---------|
|           | Baseline, % (n=221) | Follow-up, % (n=150) | p-value | Baseline, % (n=278) | Follow-up, % (n=200) | p-value | Baseline                 | Follow-up |                           |         |
| Chlamydia | 14.0 (9.7-19.3)     | 11.4 (6.8-17.6)      | 0.5638  | 12.2 (8.6-16.7)     | 9.5 (5.8-14.4)       | 0.4294  | 0.6466                   | 0.6875    | 1.16 (0.57-2.33)          | 0.6886  |
| Gonorrhea | 5.4 (2.8-9.3)       | 2.7 (0.74-6.7)       | 0.3112  | 0.72 (0.09-2.6)     | 3.0 (1.1-6.4)        | 0.0731  | 0.0038                   | 1.000     | 0.96 (0.30-3.09)          | 0.9484  |
| Syphilis  | 0.45 (0.0-2.5)      | 0.67 (0.0-3.7)       | 0.6657  | 1.4 (0.39-3.6)      | 2.0 (0.55-5.0)       | 0.7256  | 0.3888                   | 0.3969    | 0.39 (0.06-2.73)          | 0.3433  |
| Any STI   | 17.7 (12.9-23.3)    | 14.1 (8.9-20.7)      | 0.4439  | 14.0 (10.2-18.7)    | 14.5 (9.9-20.2)      | 0.9898  | 0.3264                   | 0.9645    | 0.94 (0.51-1.74)          | 0.8398  |

<sup>a</sup> 95% exact binomial confidence interval

<sup>b</sup> Includes participants who had at least one follow-up visit: 221 participants were in the intervention group and 278 in the control group.

<sup>c</sup> Adjusted odds ratio, intervention group vs. control group at follow-up after adjusting for baseline level and venue type
